# Supplementary material for: The Association between Cyclin Dependent Kinase 2 Associated Protein 1 (CDK2AP1) and Molecular Subtypes of Lethal Prostate Cancer
Source: MDPI journal article supplement (doi:10.3390/ijms232113326), 2022-11-01
Supplement: s1 [file s1]

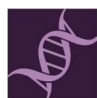

Supplementary Table S1. CDK2AP1 expression in metastatic and non metastatic PCa.

| Variables            | No Mets     | Mets      | p-value |
|----------------------|-------------|-----------|---------|
| <b>CDK2AP1</b>       |             |           |         |
| Score 0 or 1         | 119 (51.5)  | 15 (34.1) | 0.034   |
| Score 2 or 3         | 112 (48.5)  | 29 (65.9) |         |
| <b>AR</b>            |             |           |         |
| Score 0 or 1         | 15 (6.7)    | 7 (17.9)  | 0.019   |
| Score 2 or 3         | 209 (93.3)  | 32 (82.1) |         |
| <b>PTEN</b>          |             |           |         |
| Score 0              | 74 (32.7)   | 19 (45.2) | 0.118   |
| Score 1,2,3          | 152 (67.3)  | 23 (54.8) |         |
| <b>ERG</b>           |             |           |         |
| Negative             | 169 (74.8)  | 30 (69.8) | 0.492   |
| Positive             | 57 (25.2)   | 13 (30.2) |         |
| <b>P53</b>           |             |           |         |
| Score 0,2,3          | 38 (18.4)   | 11 (28.2) | 0.158   |
| Score 1              | 169 ( 81.6) | 28 (71.8) |         |
| <b>CDK2AP1/PTEN</b>  |             |           |         |
| HR PTEN + HR CDK2AP1 | 51 (22.6)   | 15 (34.9) | 0.080   |
| HR PTEN + LR CDK2AP1 | 23 (10.2)   | 5 (11.6)  |         |
| LR PTEN + HR CDK2AP1 | 59 (26.1)   | 14 (32.6) |         |
| LR PTEN + LR CDK2AP1 | 93 (41.2)   | 9 (20.9)  |         |
| <b>CDK2AP1/AR</b>    |             |           |         |
| HR AR + HR CDK2AP1   | 7 (3.1)     | 3 (7.7)   | 0.013   |
| HR AR + LR CDK2AP1   | 8 (3.6)     | 4 (10.3)  |         |
| LR AR + HR CDK2AP1   | 103 (46.0)  | 23 (59.0) |         |
| LR AR + LR CDK2AP1   | 106 (47.3)  | 9 (23.1)  |         |
| <b>CDK2AP1/ERG</b>   |             |           |         |
| HR ERG + HR CDK2AP1  | 40 (17.7)   | 10 (23.3) | 0.141   |
| HR ERG + LR CDK2AP1  | 17 (7.5)    | 3 (7.0)   |         |
| LR ERG + HR CDK2AP1  | 70 (31.0)   | 19 (44.2) |         |
| LR ERG + LR CDK2AP1  | 99 (43.8)   | 11 (25.6) |         |
| <b>CDK2AP1/p53</b>   |             |           |         |
| HR p53 + HR CDK2AP1  | 29 (14.0)   | 10 (25.6) | 0.061   |
| HR p53 + LR CDK2AP1  | 9 (4.3)     | 1 (2.6)   |         |
| LR p53 + HR CDK2AP1  | 79 (38.2)   | 19 (48.7) |         |
| LR p53 + LR CDK2AP1  | 90 (43.5)   | 9 (23.1)  |         |

HR (high risk) PTEN; PTEN negative, LR (low risk) PTEN; PTEN weak, moderate and high intensity

HR ERG; ERG positive, LR ERG, ERG negative

HR CDK2AP1; negative and weak intensity

LR CDK2AP1; moderate and high intensity

HR p53 (p53; 0), LR p53 (p53; 1,2,3) (see methods for further explanation).

Supplementary Table S2. Number of patients at risk

| Timepoints/Categories                | 0 months | 20 months | 40 months | 60 months | 90 months | 100 months |
|--------------------------------------|----------|-----------|-----------|-----------|-----------|------------|
| <b>CDK2AP1 and PTEN combined</b>     |          |           |           |           |           |            |
| High risk PTEN and High risk CDK2AP1 | 62       | 32        | 19        | 9         | 6         |            |
| High risk PTEN and Low risk CDK2AP1  | 28       | 17        | 10        | 3         |           |            |
| Low risk PTEN and High risk CDK2AP1  | 72       | 55        | 35        | 11        | 3         |            |
| Low risk PTEN and Low risk CDK2AP1   | 98       | 85        | 63        | 37        | 7         | 1          |
| <b>CDK2AP1 and ERG combined</b>      |          |           |           |           |           |            |
| High risk ERG and High risk CDK2AP1  | 48       | 31        | 17        | 8         | 5         |            |
| High risk ERG and Low risk CDK2AP1   | 20       | 13        | 8         | 2         |           |            |
| Low risk ERG and High risk CDK2AP1   | 86       | 56        | 37        | 12        | 4         |            |
| Low risk ERG and Low risk CDK2AP1    | 106      | 89        | 65        | 38        | 7         | 1          |
| <b>CDK and P53 combined</b>          |          |           |           |           |           |            |
| High risk P53 and High risk CDK2AP1  | 27       | 13        | 7         | 3         | 2         |            |
| High risk P53 and Low risk CDK2AP1   | 9        | 4         | 4         | 1         |           |            |
| Low risk P53 and High risk CDK2AP1   | 94       | 73        | 46        | 16        | 7         |            |
| Low risk P53 and Low risk CDK2AP1    | 96       | 82        | 58        | 32        | 5         | 1          |

Supplementary Table S3. Hydrogen Bonding Contacts

| CDK2AP1 Residue | p53 residue(s) |
|-----------------|----------------|
| G2              | E198           |
| H3              | H233           |
| H8              | E224           |
| H10             | Q144, S227     |
| S11             | D228           |
| E21             | H115           |
| E22             | L111           |
| K25             | E286           |
| E26             | N131           |
| S36             | Q100           |
| E39             | K101-T102      |
| R40             | N268           |
| G44             | R110           |

Supplementary Table S4. Physical contacts within 4 angstroms

| CDK2AP1 Residue | p53 residue(s)                      |
|-----------------|-------------------------------------|
| M1              | D186, R196, S185, D186, N235, E198  |
| G2              | E198, G199,                         |
| H3              | G199, N200, L201, H233,             |
| H4              | T140, E198,                         |
| H5              | H233                                |
| H6              | T140, P142, H233, T231,             |
| H8              | E224, V225, G226                    |
| S9              | G226                                |
| H10             | Q144, W146, C229, D228, G226        |
| S11             | D228                                |
| E15             | W146,                               |
| L17             | H115                                |
| E21             | H115, P128                          |
| E22             | L111, Q104,                         |
| K25             | P128, E286, R282, S127, P128, A129  |
| E26             | N131,                               |
| R28             | L130                                |
| S36             | Q100. K101, T102                    |
| E39             | K101, T102                          |
| R40             | Q104, S269, L111, N268, N131, T102, |
| R43             | Q104, S106, G108, D148, R110,       |
| G44             | R110                                |
| H47             | D148, R110                          |
